# Supplementary material for: Exploring the impact of cancer registry completeness on international cancer survival differences: a simulation study
Source: PubMed Central journal article supplement (PMC7921088; doi:10.1038/s41416-020-01196-7), 2020-12-09
Supplement: 41416_2020_1196_MOESM1_ESM.pdf [file 41416_2020_1196_MOESM1_ESM.pdf]

## Supplementary material

The models used for simulating the cancer-specific and other cause mortality.

The Stata program `survsim` [1] was used to simulate both the time to death due to cancer and time to death due to other causes.

Time to death due to cancer was simulated from a model with the log cumulative hazard expressed as:

$$\ln H(t) = \ln \lambda + \gamma * \ln t + \ln 1.03 * \text{agec} + \ln 0.99 * \text{agec} * \ln t + \ln \text{HRc} * X'$$

where `agec` is age at diagnosis centered around the mean value 70, and `X'` is -0.25 for those without the prognostic Factor X and 0.75 for those with Factor X (e.g. centered around the mean value). `HRc` is the hazard ratio for the effect of the prognostic Factor X on cancer-specific mortality, and varied across scenarios. The `lambda` and `gamma` also varied across the simulated scenarios as seen below.

| Level of survival | Scenarios | Lambda | Gamma |
|-------------------|-----------|--------|-------|
| Low               | A, D, G   | 0.61   | 0.63  |
| Intermediate      | B, E, H   | 0.4    | 0.6   |
| High              | C, F, I   | 0.12   | 0.64  |

Age at death due to other causes was simulated from a model with the log hazard expressed as:

$$\ln h(\text{age} + t) = -9.4 + 0.056 * s_1(\text{age} + t) - 0.000046 * s_2(\text{age} + t) + 0.000033 * s_3(\text{age} + t) - 0.000012 * s_4(\text{age} + t) + \ln \text{HRo} * X'$$

where `s(t)` are restricted cubic spline functions [2], with knots at the values 18, 38, 58.5, 79 and 99, and `age` is age at diagnosis. `HRo` is the hazard ratio for the effect of the prognostic Factor X on other cause mortality, and varied across scenarios.

1. Crowther MJ, Lambert PC. Simulating biologically plausible complex survival data. *Stat Med.* 2013;32(23):4118-4134.
2. Durrleman S, Simon R. Flexible regression-models with cubic-splines. *Statistics in Medicine* 1989; 8:551–561.

Table S1. The proportion of death certificate initiated (DCI) and death certificate only (DCO) cases in the 3 main simulated scenarios (scenario A-C), for each of the investigated registration errors. Prob = probability, RR = relative risk.

| Registration error |           |                 |                 | Scenario A |       | Scenario B |       | Scenario C |       |
|--------------------|-----------|-----------------|-----------------|------------|-------|------------|-------|------------|-------|
| Prob missed        | RR missed | Prob trace-back | Prob wrong date | % DCI      | % DCO | % DCI      | % DCO | % DCI      | % DCO |
| 0.05               | 1.5       | 0.70            | 0.0             | 4.06       | 1.22  | 3.28       | 0.99  | 1.51       | 0.46  |
| 0.05               | 1.5       | 0.90            | 0.0             | 4.02       | 0.41  | 3.26       | 0.34  | 1.47       | 0.14  |
| 0.05               | 5         | 0.70            | 0.0             | 4.22       | 1.22  | 3.45       | 1.04  | 1.62       | 0.50  |
| 0.05               | 5         | 0.90            | 0.0             | 4.21       | 0.42  | 3.48       | 0.35  | 1.63       | 0.17  |
| 0.05               | 1.5       | 0.70            | 0.30            | 4.08       | 1.22  | 3.27       | 0.98  | 1.48       | 0.44  |
| 0.05               | 1.5       | 0.90            | 0.30            | 4.05       | 0.40  | 3.22       | 0.31  | 1.52       | 0.15  |
| 0.05               | 5         | 0.70            | 0.30            | 4.20       | 1.26  | 3.50       | 1.05  | 1.66       | 0.50  |
| 0.05               | 5         | 0.90            | 0.30            | 4.19       | 0.42  | 3.45       | 0.34  | 1.62       | 0.16  |
| 0.10               | 1.5       | 0.70            | 0.0             | 8.15       | 2.45  | 6.67       | 1.99  | 3.12       | 0.94  |
| 0.10               | 1.5       | 0.90            | 0.0             | 8.17       | 0.82  | 6.61       | 0.68  | 3.13       | 0.31  |
| 0.10               | 5         | 0.70            | 0.0             | 8.50       | 2.53  | 7.02       | 2.14  | 3.42       | 1.02  |
| 0.10               | 5         | 0.90            | 0.0             | 8.46       | 0.85  | 7.03       | 0.70  | 3.39       | 0.34  |
| 0.10               | 1.5       | 0.70            | 0.30            | 8.22       | 2.49  | 6.62       | 2.00  | 3.09       | 0.95  |
| 0.10               | 1.5       | 0.90            | 0.30            | 8.11       | 0.82  | 6.69       | 0.66  | 3.07       | 0.30  |
| 0.10               | 5         | 0.70            | 0.30            | 8.48       | 2.54  | 7.05       | 2.11  | 3.42       | 1.02  |
| 0.10               | 5         | 0.90            | 0.30            | 8.40       | 0.82  | 7.08       | 0.70  | 3.38       | 0.34  |
| 0.20               | 1.5       | 0.70            | 0.0             | 16.5       | 4.96  | 13.8       | 4.18  | 6.75       | 2.02  |
| 0.20               | 1.5       | 0.90            | 0.0             | 16.7       | 1.70  | 13.8       | 1.38  | 6.66       | 0.66  |
| 0.20               | 5         | 0.70            | 0.0             | 17.2       | 5.13  | 14.6       | 4.35  | 7.28       | 2.19  |
| 0.20               | 5         | 0.90            | 0.0             | 17.2       | 1.73  | 14.7       | 1.49  | 7.39       | 0.75  |
| 0.20               | 1.5       | 0.70            | 0.30            | 16.6       | 4.99  | 13.8       | 4.12  | 6.73       | 2.01  |
| 0.20               | 1.5       | 0.90            | 0.30            | 16.5       | 1.65  | 13.8       | 1.39  | 6.72       | 0.66  |
| 0.20               | 5         | 0.70            | 0.30            | 17.2       | 5.16  | 14.5       | 4.32  | 7.32       | 2.18  |
| 0.20               | 5         | 0.90            | 0.30            | 17.2       | 1.72  | 14.6       | 1.46  | 7.33       | 0.72  |

Figure S1. Bias in 5-year net survival estimates for those without (upper panel) and with (lower panel) prognostic Factor X for different simulated scenarios of registration errors, with 5%, 10% or 20% of cases missed at diagnosis, and 70% or 90% of those missed found through trace-back (indicated by blue and yellow markers, respectively). The relative risk (RR) of being missed for those with the prognostic Factor X compared to those without Factor X is 5 or 1.5, and scenarios with unaltered follow-up time (circles) and shortened follow-up time for 30% of those found through trace-back (triangles) are presented.

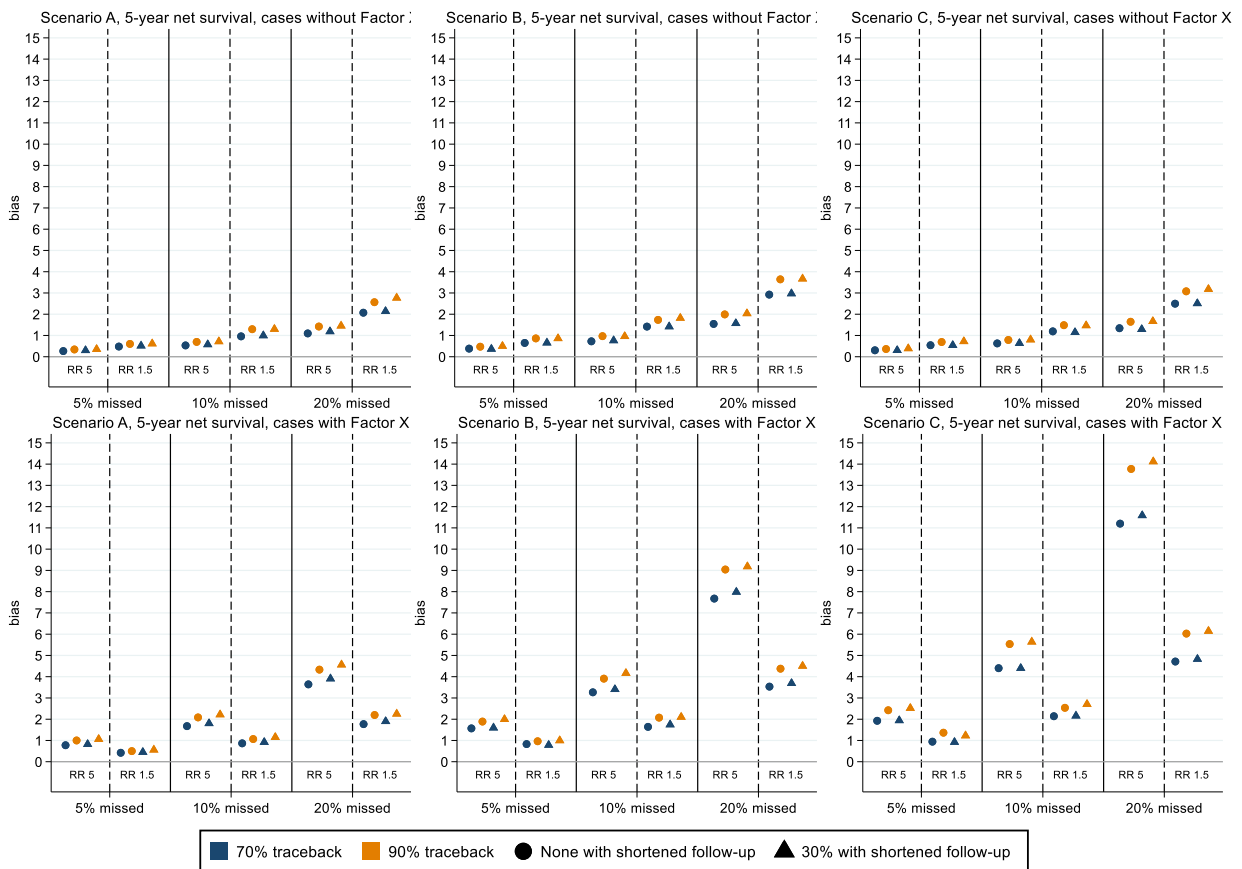

Bias is measured as a percentage point difference, and all registration errors lead to an underestimation of survival.

Figure S2. Bias in 1- (upper panel) and 5-year (lower panel) net survival estimates for different simulated scenarios of registration errors, with 5%, 10% or 20% of cases missed at diagnosis, and 70% or 90% of those missed found through-trace back (indicated by blue and yellow markers, respectively). The relative risk (RR) of being missed for those with the prognostic Factor X compared to those without Factor X is 5 or 1.5, and scenarios with unaltered follow-up time (circles) and shortened follow-up time for 30% of those found through trace-back (triangles) are presented.

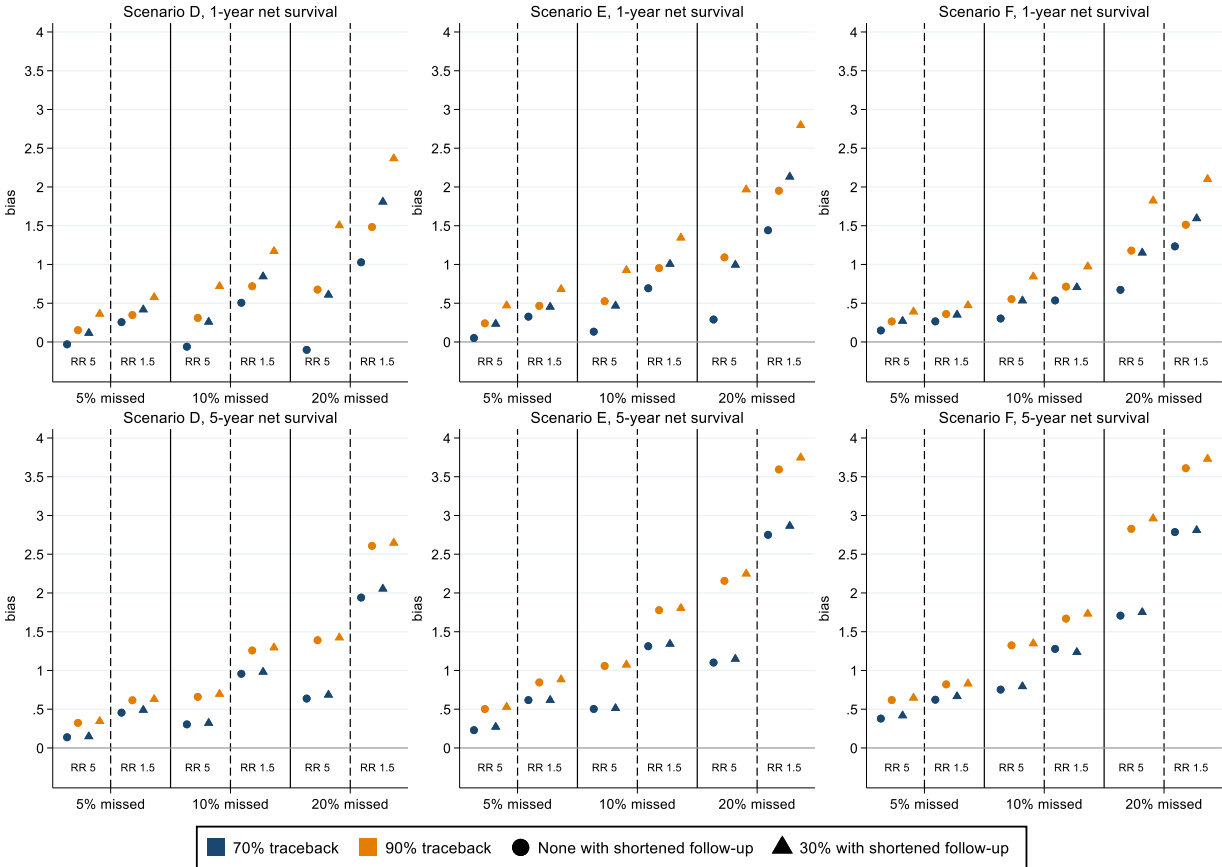

Bias is measured as a percentage point difference, and all registration errors lead to an underestimation of survival.

Figure S3. Bias in 1- (upper panel) and 5-year (lower panel) net survival estimates for different simulated scenarios of registration errors, with 5%, 10% or 20% of cases missed at diagnosis, and 70% or 90% of those missed found through trace-back (indicated by blue and yellow markers, respectively). The relative risk (RR) of being missed for those with the prognostic Factor X compared to those without Factor X is 5 or 1.5, and scenarios with unaltered follow-up time (circles) and shortened follow-up time for 30% of those found through trace-back (triangles) are presented.

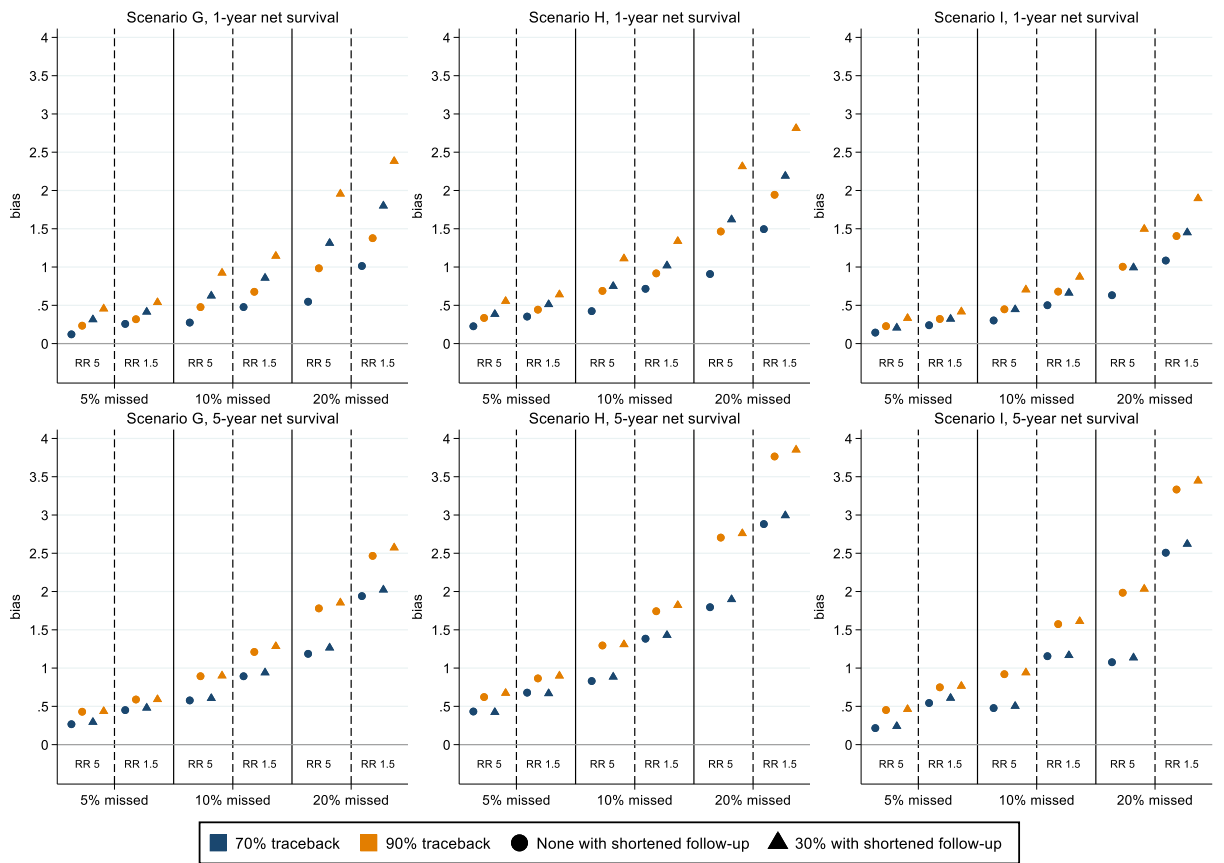

Bias is measured as a percentage point difference, and all registration errors lead to an underestimation of survival.
